# Supplementary material
Source: PubMed Central journal article supplement (PMC10199298)

## Online Supplement

### Reconsidering rural-nonrural college enrollment gaps: The role of socioeconomic status in geographies of opportunity

Authors: Ryan S. Wells, Ling Chen, Genia M. Bettencourt, Sarah Haas  
Correspondence: Ryan S. Wells – [rswells@umass.edu](mailto:rswells@umass.edu)  
Article: Reconsidering rural-nonrural college enrollment gaps: The role of socioeconomic status in geographies of opportunity  
Journal: *Research in Higher Education*

This online supplement includes sensitivity analyses that:

1. Utilize an alternate coding for the “rural” variable, where the “town” local is included in the “nonrural” category [Tables S1-S3] [Figures S1-S2].
2. Utilize linear probability modeling, rather than the logistic regression analyses in the main article. [Table S4]

It also includes:

3. A version of the figures from the article, but with confidence intervals included on the graphs. [Figures S3-S4]

## 1. Sensitivity Analyses with the Town locale categorized as Nonrural rather than Rural

Table S1. Means and standard errors of the estimates, for all variables - Town locale categorized as Nonrural rather than Rural

| Variable                       | All Students |        | Rural Students |        | Nonrural Students |        | Difference |
|--------------------------------|--------------|--------|----------------|--------|-------------------|--------|------------|
|                                | Mean         | SE     | Mean           | SE     | Mean              | SE     |            |
| Attend college                 | 0.75         | (0.01) | 0.73           | (0.01) | 0.76              | (0.01) | -0.03*     |
| Four-year college              | 0.51         | (0.01) | 0.50           | (0.02) | 0.51              | (0.01) | -0.01      |
| SES                            | -0.04        | (0.02) | -0.04          | (0.03) | -0.05             | (0.02) | 0.01       |
| Expect to attend PSE           | 0.81         | (0.01) | 0.82           | (0.01) | 0.81              | (0.01) | 0.01       |
| GPA                            | 2.74         | (0.02) | 2.80           | (0.02) | 2.72              | (0.02) | 0.08**     |
| Min. academic preparation      | 0.74         | (0.01) | 0.75           | (0.02) | 0.74              | (0.01) | 0.01       |
| SAT score (std)                | -0.33        | (0.03) | -0.32          | (0.04) | -0.33             | (0.04) | 0.01       |
| Race/ethnicity                 |              |        |                |        |                   |        |            |
| White                          | 0.52         | (0.02) | 0.66           | (0.02) | 0.47              | (0.02) | 0.19***    |
| Black                          | 0.13         | (0.01) | 0.12           | (0.02) | 0.14              | (0.01) | -0.02      |
| Latinx                         | 0.22         | (0.01) | 0.13           | (0.01) | 0.25              | (0.02) | -0.12***   |
| Asian/Pacific Islander         | 0.04         | (0.00) | 0.02           | (0.00) | 0.05              | (0.01) | -0.03***   |
| Amer. Indian/Alaska Native     | 0.01         | (0.00) | 0.01           | (0.00) | 0.01              | (0.00) | 0.00       |
| Multiracial                    | 0.08         | (0.00) | 0.08           | (0.01) | 0.08              | (0.00) | 0.00       |
| Female                         | 0.50         | (0.01) | 0.48           | (0.01) | 0.51              | (0.01) | -0.03      |
| College-going structure        | 5.03         | (0.04) | 5.10           | (0.07) | 5.01              | (0.05) | -0.09      |
| % students in AP (std)         | -0.12        | (0.03) | -0.33          | (0.05) | -0.03             | (0.04) | -0.30***   |
| % students on free lunch (std) | 0.23         | (0.05) | 0.13           | (0.06) | 0.27              | (0.06) | -0.14      |
| Observations                   | 13,010       |        | 3,740          |        | 9,270             |        |            |

\* p<.05; \*\* p<.01; \*\*\* p<0.001

NOTE: All reported sample sizes are rounded to the nearest 10 in accordance with NCES restricted data license.

Significant differences between rural and nonrural indicated.

SOURCE: U.S. Department of Education, National Center for Education Statistics, 2009-16 High School Longitudinal Study (HSL:09/16).

Table S2. Average marginal effects on enrolling in postsecondary education - **Town locale categorized as Nonrural rather than Rural**

| Independent Variables                | Any Postsecondary Enrollment |        |            |        | Four-year College Enrollment |        |            |        |
|--------------------------------------|------------------------------|--------|------------|--------|------------------------------|--------|------------|--------|
|                                      | Model 1                      |        | Model 2    |        | Model 3                      |        | Model 4    |        |
|                                      | (unadjusted)                 |        | (adjusted) |        | (unadjusted)                 |        | (adjusted) |        |
|                                      | AME                          | (SE)   | AME        | (SE)   | AME                          | (SE)   | AME        | (SE)   |
| Rural                                | -0.04**                      | (0.01) | -0.04***   | (0.01) | -0.01                        | (0.02) | -0.02      | (0.02) |
| SES                                  | 0.17***                      | (0.01) | 0.08***    | (0.01) | 0.20***                      | (0.01) | 0.07***    | (0.01) |
| Expect to attend PSE                 |                              |        | 0.15***    | (0.02) |                              |        | 0.09***    | (0.02) |
| GPA                                  |                              |        | 0.14***    | (0.01) |                              |        | 0.20***    | (0.01) |
| Min. academic preparation            |                              |        | 0.03       | (0.01) |                              |        | 0.04*      | (0.02) |
| SAT score (std)                      |                              |        | 0.04***    | (0.01) |                              |        | 0.11***    | (0.01) |
| Race/ethnicity                       |                              |        |            |        |                              |        |            |        |
| Black                                |                              |        | 0.03       | (0.02) |                              |        | 0.11***    | (0.02) |
| Latinx                               |                              |        | 0.04*      | (0.02) |                              |        | -0.07**    | (0.02) |
| Asian/Pacific Islander               |                              |        | -0.01      | (0.03) |                              |        | -0.08**    | (0.03) |
| Amer. Indian/Alaska Native           |                              |        | 0.00       | (0.05) |                              |        | 0.15*      | (0.07) |
| Multiracial                          |                              |        | 0.00       | (0.02) |                              |        | -0.03      | (0.02) |
| White                                |                              |        | -0.05***   | (0.01) |                              |        | -0.07***   | (0.02) |
| Female                               |                              |        | 0.03**     | (0.01) |                              |        | -0.03*     | (0.01) |
| College-going structure              |                              |        | 0.01       | (0.01) |                              |        | 0.00       | (0.01) |
| % students in AP (std)               |                              |        | 0.02       | (0.01) |                              |        | 0.03**     | (0.01) |
| % students on free lunch (std)       |                              |        | -0.02*     | (0.01) |                              |        | 0.00       | (0.01) |
| Observations                         | 13,010                       |        | 13,010     |        | 10,510                       |        | 10,510     |        |
| Log likelihood                       | -2,069,215                   |        | -1,670,685 |        | -2,518,526                   |        | -1,942,112 |        |
| McFadden's R <sup>2</sup> (adjusted) | 0.078                        |        | 0.256      |        | 0.094                        |        | 0.301      |        |

\* p<.05; \*\* p<.01; \*\*\* p<0.001

NOTE: All reported sample sizes are rounded to the nearest 10 in accordance with NCES restricted data license.

Significant differences between rural and nonrural indicated.

SOURCE: U.S. Department of Education, National Center for Education Statistics, 2009-16 High School Longitudinal Study (HSLs:09/16).

Table S3. Probability of enrolling in postsecondary education at representative values of SES, by rural vs nonrural status - **Town locale categorized as Nonrural rather than Rural**

|                                     | Unadjusted (Model 1) |          |         | Adjusted (Model 2) |          |         |
|-------------------------------------|----------------------|----------|---------|--------------------|----------|---------|
|                                     | Rural                | Nonrural | Diff    | Rural              | Nonrural | Diff    |
| <b>Any Postsecondary Enrollment</b> |                      |          |         |                    |          |         |
| SES=-2                              | 0.27                 | 0.35     | -0.08   | 0.50               | 0.59     | -0.09   |
| SES=-1                              | 0.52                 | 0.59     | -0.07*  | 0.62               | 0.68     | -0.06** |
| SES=0                               | 0.76                 | 0.79     | -0.03** | 0.72               | 0.76     | -0.04** |
| SES=1                               | 0.90                 | 0.91     | -0.01   | 0.81               | 0.83     | -0.02   |
| SES=2                               | 0.96                 | 0.97     | -0.01   | 0.88               | 0.88     | 0.00    |
| <b>Four-year College Enrollment</b> |                      |          |         |                    |          |         |
| SES=-2                              | 0.22                 | 0.16     | 0.06    | 0.37               | 0.36     | 0.01    |
| SES=-1                              | 0.38                 | 0.34     | 0.04    | 0.42               | 0.43     | -0.01   |
| SES=0                               | 0.58                 | 0.58     | 0.00    | 0.48               | 0.50     | -0.02   |
| SES=1                               | 0.75                 | 0.79     | -0.04   | 0.54               | 0.57     | -0.03   |
| SES=2                               | 0.87                 | 0.91     | -0.04   | 0.60               | 0.63     | -0.03   |

\* p<.05; \*\* p<.01; \*\*\* p<0.001

NOTE: Significant differences between rural and nonrural indicated.

SOURCE: U.S. Department of Education, National Center for Education Statistics, 2009-16 High School Longitudinal Study (HSL:09/16).

Figure S1. Probabilities of enrolling in postsecondary education across SES, by rural vs nonrural status - **Town locale categorized as Nonrural rather than Rural**

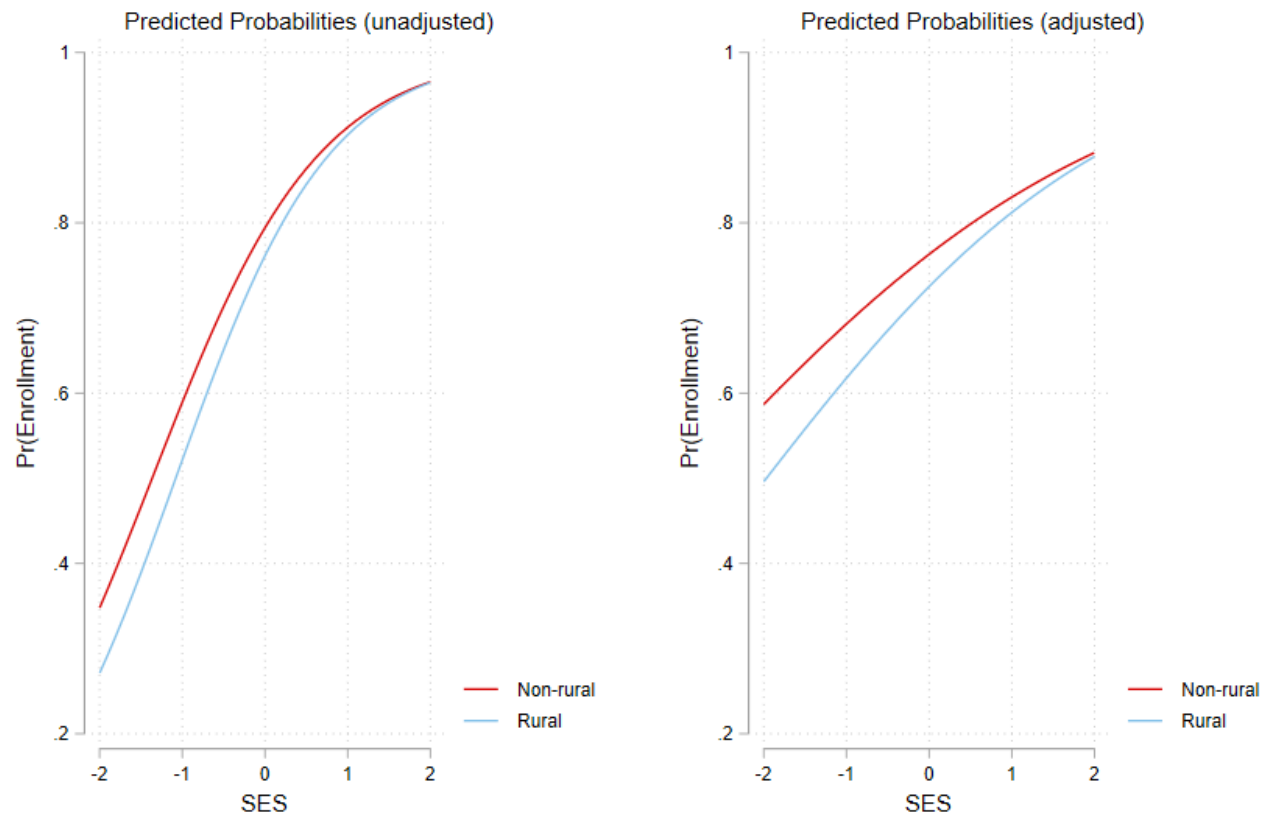

Figure S2. Probabilities of attending four-year college across SES, by rural vs nonrural status - **Town locale categorized as Nonrural rather than Rural**

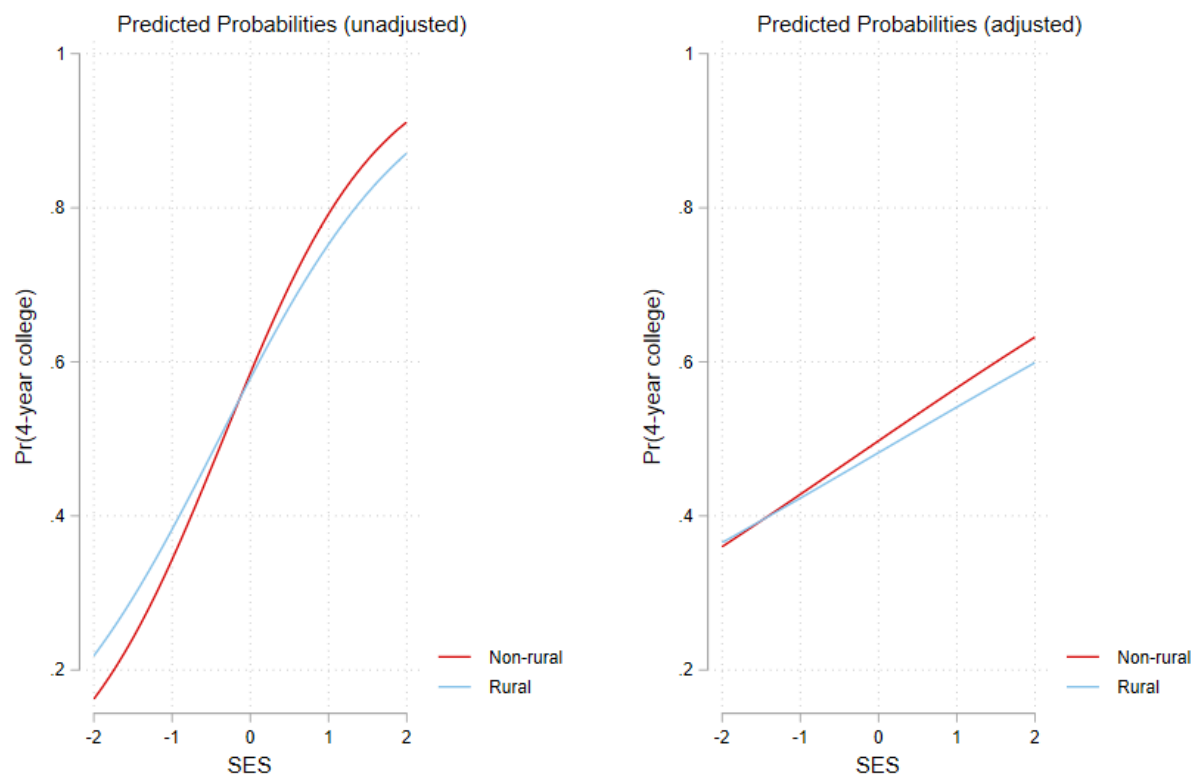

## 2. Sensitivity analyses utilizing linear probability modeling, rather than the logistic regression analyses in the main article.

Table S4. Average marginal effects (OLS) on enrolling in postsecondary education - **linear probability model**

| Independent Variables          | Any Postsecondary Enrollment |        |                       |        | Four-year College Enrollment |        |                       |        |
|--------------------------------|------------------------------|--------|-----------------------|--------|------------------------------|--------|-----------------------|--------|
|                                | Model 1<br>(unadjusted)      |        | Model 2<br>(adjusted) |        | Model 3<br>(unadjusted)      |        | Model 4<br>(adjusted) |        |
|                                | AME                          | (SE)   | AME                   | (SE)   | AME                          | (SE)   | AME                   | (SE)   |
| Rural                          | -0.05***                     | (0.01) | -0.05***              | (0.01) | -0.03                        | (0.02) | -0.05**               | (0.02) |
| SES                            | 0.16***                      | (0.01) | 0.06***               | (0.01) | 0.20***                      | (0.01) | 0.06***               | (0.01) |
| Expect to attend PSE           |                              |        | 0.19***               | (0.02) |                              |        | 0.10***               | (0.02) |
| GPA                            |                              |        | 0.17***               | (0.01) |                              |        | 0.22***               | (0.01) |
| Min. academic preparation      |                              |        | 0.04**                | (0.02) |                              |        | 0.03                  | (0.02) |
| SAT score (std)                |                              |        | 0.03**                | (0.01) |                              |        | 0.11***               | (0.01) |
| Race/ethnicity                 |                              |        |                       |        |                              |        |                       |        |
| Black                          |                              |        | 0.03                  | (0.02) |                              |        | 0.12***               | (0.02) |
| Latinx                         |                              |        | 0.04*                 | (0.02) |                              |        | -0.08***              | (0.02) |
| Asian/Pacific Islander         |                              |        | -0.01                 | (0.03) |                              |        | -0.08**               | (0.03) |
| Amer. Indian/Alaska Native     |                              |        | -0.02                 | (0.07) |                              |        | 0.13*                 | (0.05) |
| Multiracial                    |                              |        | 0.01                  | (0.03) |                              |        | -0.03                 | (0.02) |
| White                          |                              |        | -0.05**               | (0.02) |                              |        | -0.06***              | (0.02) |
| Female                         |                              |        | 0.02*                 | (0.01) |                              |        | -0.00                 | (0.01) |
| College-going structure        |                              |        | 0.00                  | (0.01) |                              |        | 0.00                  | (0.01) |
| % students in AP (std)         |                              |        | 0.01                  | (0.01) |                              |        | 0.03*                 | (0.01) |
| % students on free lunch (std) |                              |        | -0.03*                | (0.01) |                              |        | -0.01                 | (0.01) |
| Observations                   | 13,010                       |        | 13,010                |        | 10,510                       |        | 10,510                |        |
| R <sup>2</sup>                 | 0.08                         |        | 0.27                  |        | 0.12                         |        | 0.35                  |        |

\* p<.05; \*\* p<.01; \*\*\* p<0.001

NOTE: All reported sample sizes are rounded to the nearest 10 in accordance with NCES restricted data license.

Significant differences between rural and nonrural indicated.

SOURCE: U.S. Department of Education, National Center for Education Statistics, 2009-16 High School Longitudinal Study (HSL:09/16).

3. A version of the figures from the article, but with confidence intervals included on the graphs.

Figure S3. Probabilities of attending four-year college across SES, by rural vs nonrural status - **Town locale categorized as Rural, Confidence Intervals Included**

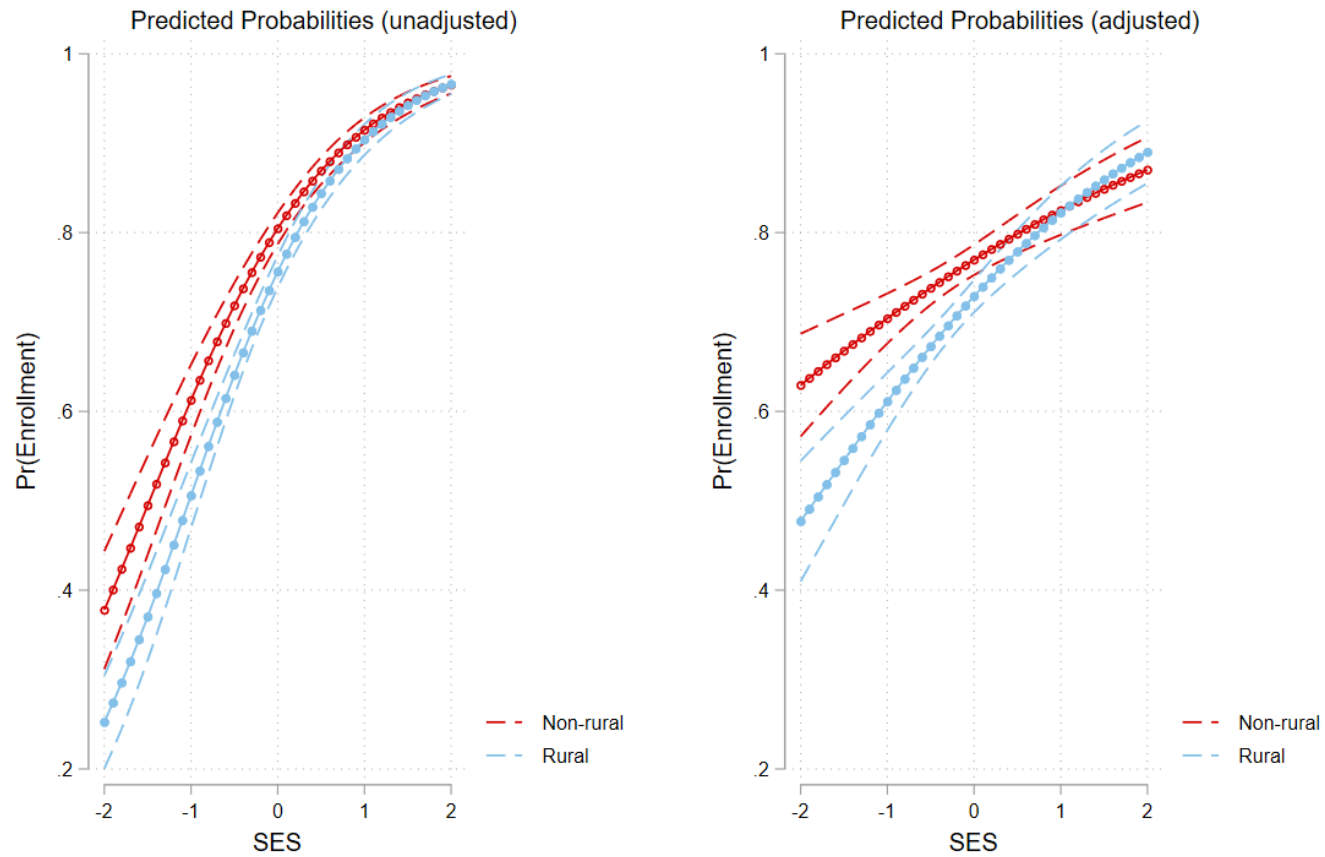



Figure S4. Probabilities of attending four-year college across SES, by rural vs nonrural status - **Town locale categorized as Rural, Confidence Intervals Included**

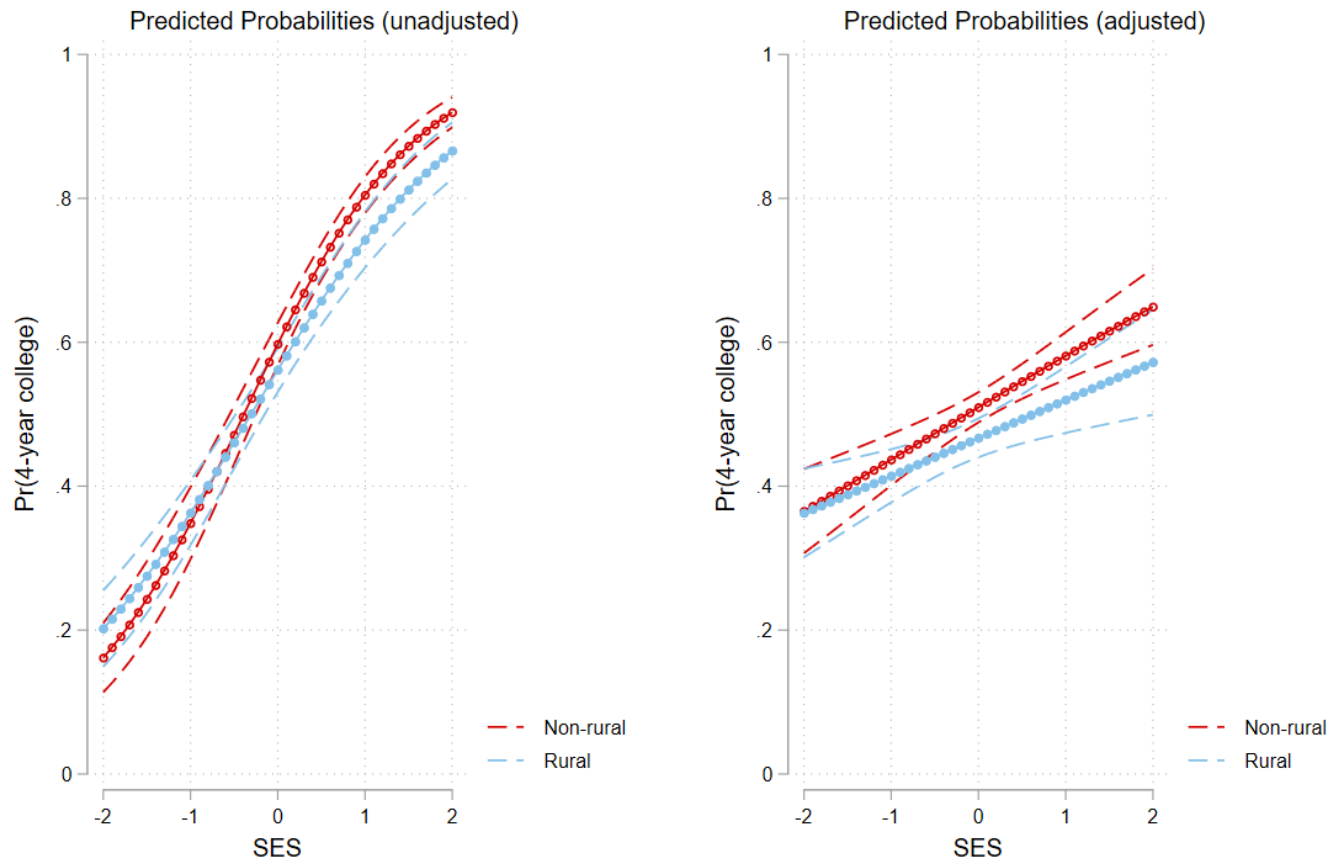

Supplement: 11162_2023_9737_MOESM1_ESM.pdf [file 11162_2023_9737_MOESM1_ESM.pdf]
